# Supplementary material for: Mapping and Validation of QTLs for the Amino Acid and Total Protein Content in Brown Rice
Source: PubMed Central journal article supplement (PMC7089939; doi:10.3389/fgene.2020.00240), 2020-03-17
Supplement: Presentation_1.pdf [file Presentation_1.pdf]

## *Supplementary Material*

Supplementary Table 1. Primers used in this study

| Target QTL     | Primer    | Forward sequence          | Reverse sequence          | Size (bp) |     |
|----------------|-----------|---------------------------|---------------------------|-----------|-----|
|                |           |                           |                           | T887      | M23 |
| <i>qAAC7.1</i> | id4638739 | TCACATGTCTTCACTTTTCAACCA  | TAACTCACAAACTCCTCCTGCC    | 173       | 142 |
|                | id4734109 | TCGTTTGACTGACATAAACCTAGGA | TGACGTAAGTTCACCGTGATT     | 153       | 130 |
|                | id4819110 | TGACATGTCCAAAAGGTTTAGAATT | GCAAAGTACAATTAAGTTCGCTCGA | 180       | 153 |
|                | id4906614 | TGAGCAACTAATGTTTTTCCGGT   | CAAACACATACCTCAACGCTCA    | 155       | 173 |
|                | id5056584 | AATTTTGCATGCTGGTGAAATTG   | AGAAAAGTCTATTCATCCCTCGAGG | 126       | 111 |
|                | id5200843 | CTTGATGAAAAGGGGATCGGAGG   | CAAATTCTGGCATCCTCCCTTTG   | 131       | 107 |
|                | id5227020 | ACTTATTAGCGGGCCCGTAATT    | AGTACGAACAAACTGCATGCAC    | 166       | 134 |
| <i>qAAC6.1</i> | id3428419 | GAGCTCGAGCCAAATCAATGAA    | GCGATATGGGATATGTTGACCC    | 114       | 97  |
|                | id4203043 | TGACTGTGTAATTTAGCCACCA    | ACCTAAGTATCGGAGGTACCAA    | 150       | 125 |

**Supplementary Table 1. Primers used in this study**

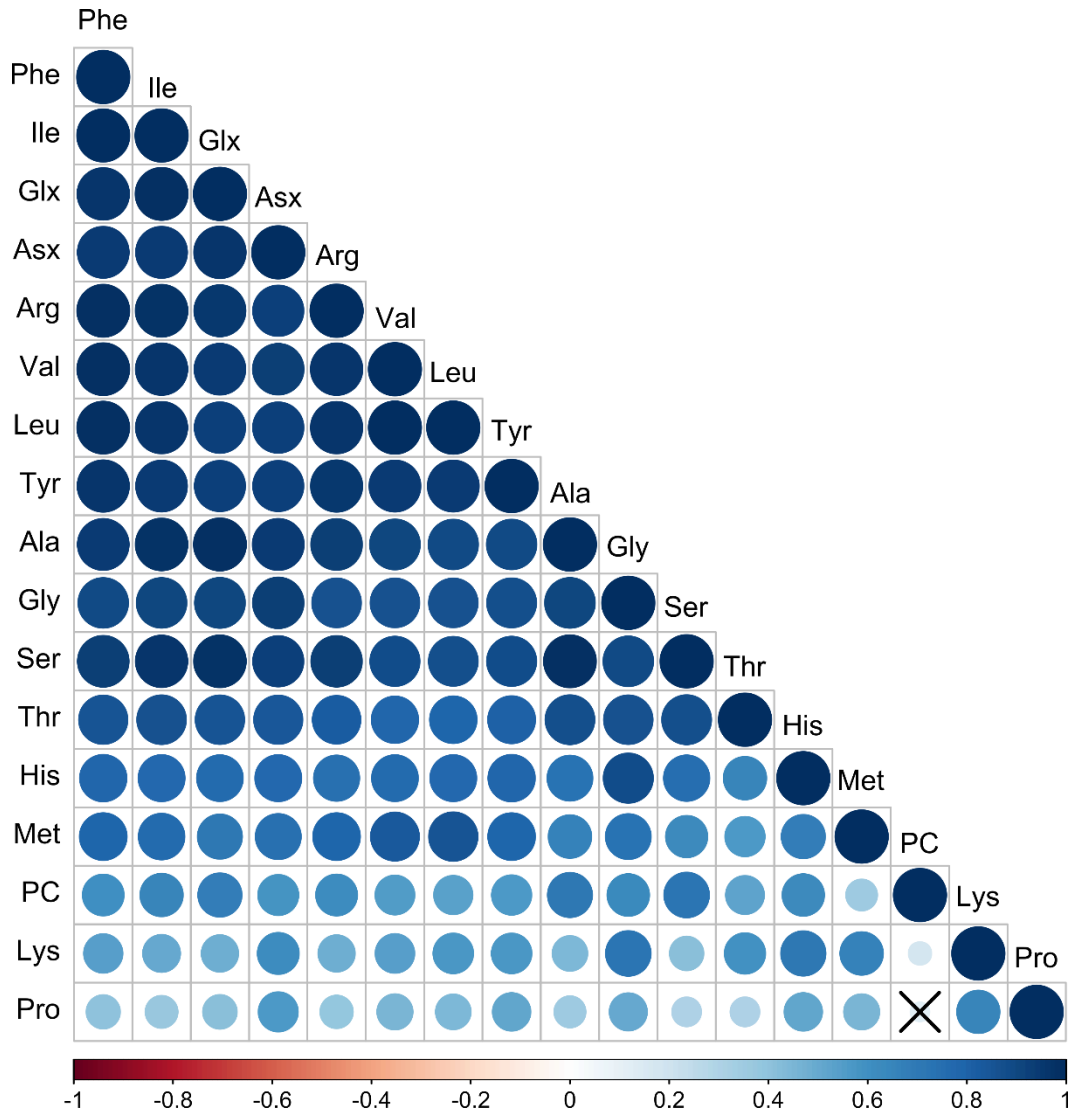

**Supplementary Figure 1.** The correlation matrix plot of AACs and PC. The correlation matrix plot represents Pearson's coefficient. Blue and red dots represent positive and negative correlation, respectively. The larger size and thicker color of dots represent the larger value of correlation. X marks insignificant coefficients ( $p < 0.05$ ).

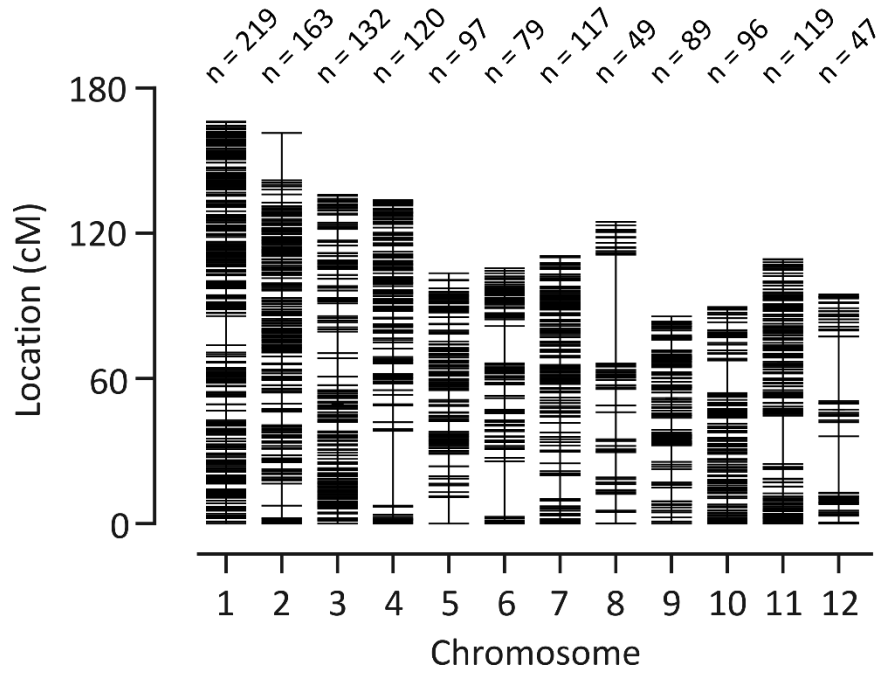

**Supplementary Figure 2.** Genetic map constructed using 155 M23/T887 RILs. A total of 1,327 bin markers were used to construct the genetic map.  $n$  represents the number of markers on each chromosome.

Supplementary Table 2. PC and AAC QTLs identified in T887 / M23 RILs

| Chr <sup>a</sup> | QTL            | Trait          | QTL position (Mb) | LOD <sup>b</sup> | PVE (%) | Add     | positive allele |         |      |
|------------------|----------------|----------------|-------------------|------------------|---------|---------|-----------------|---------|------|
| 1                | <i>qAAC1.1</i> | His            | 3.21              | 5.82             | 6.25    | 0.1153  | M23             |         |      |
|                  | <i>qAAC1.2</i> | His            | 4.40              | 11.73            | 13.71   | -0.1687 | T887            |         |      |
|                  | <i>qAAC1.3</i> | Ser            | 4.67              | 22.96            | 8.34    | -0.5241 | T887            |         |      |
|                  | <i>qPC1.1</i>  | PC             | 4.67              | 5.71             | 11.7    | -0.0005 | T887            |         |      |
|                  | <i>qAAC1.4</i> | Ser            | 5.18              | 16.41            | 5.12    | 0.4175  | M23             |         |      |
|                  | <i>qAAC1.5</i> | Ser            | 37.41             | 7.01             | 1.89    | 0.2554  | M23             |         |      |
|                  | <i>qAAC1.6</i> | His            | 39.20             | 4.46             | 4.76    | 0.1006  | M23             |         |      |
|                  | <i>qPC1.2</i>  | PC             | 39.20             | 8.68             | 18.12   | 0.0006  | M23             |         |      |
| 2                | <i>qAAC2.1</i> | Ser            | 4.14              | 3.6              | 0.94    | -0.1739 | T887            |         |      |
|                  | <i>qAAC2.2</i> | Ser            | 18.11             | 51.7             | 29.47   | -0.9769 | T887            |         |      |
| 3                | <i>qAAC3.1</i> | Ala            | 4.58              | 2.57             | 5.49    | -0.1832 | T887            |         |      |
|                  | <i>qAAC3.2</i> | Gly            | 5.18              | 2.75             | 3.64    | -0.1322 | T887            |         |      |
| 6                | <i>qAAC6.1</i> | Ala            | 3.59              | 6                | 13.75   | 0.3013  | M23             |         |      |
|                  |                | Arg            |                   | 3.57             | 9.81    | 0.4136  | M23             |         |      |
|                  |                | Asx            |                   | 4.02             | 11.09   | 0.4340  | M23             |         |      |
|                  |                | Glx            |                   | 4.32             | 11.41   | 1.0224  | M23             |         |      |
|                  |                | Gly            |                   | 5.56             | 7.84    | 0.1987  | M23             |         |      |
|                  |                | Ile            |                   | 3.89             | 10.17   | 0.3929  | M23             |         |      |
|                  |                | Leu            |                   | 4.09             | 11.68   | 0.2083  | M23             |         |      |
|                  |                | Met            |                   | 16.9             | 10.81   | 0.3381  | M23             |         |      |
|                  |                | Phe            |                   | 4.14             | 11.32   | 0.2751  | M23             |         |      |
|                  |                | Tyr            |                   | 3.56             | 10.37   | 0.1216  | M23             |         |      |
|                  |                | Val            |                   | 4.32             | 12.35   | 0.2956  | M23             |         |      |
|                  |                | <i>qAAC6.2</i> |                   | Met              | 4.21    | 9.3     | 5.23            | -0.2479 | T887 |
|                  | 7              | <i>qAAC7.1</i> | Arg               | 4.94             | 4.29    | 12.15   | -0.4402         | T887    |      |
| Ile              |                |                | 5.84              |                  | 15.92   | -0.4699 | T887            |         |      |
| Leu              |                |                | 2.96              |                  | 8.44    | -0.1693 | T887            |         |      |
| Phe              |                |                | 4.29              |                  | 11.92   | -0.2698 | T887            |         |      |
| Ala              |                |                | 5.11              |                  | 6.95    | 15.66   | -0.3072         | T887    |      |
| Asx              |                |                | 5.17              |                  | 14.1    | -0.4677 | T887            |         |      |
| Glx              |                |                | 6.08              |                  | 16.28   | -1.1690 | T887            |         |      |
| Ser              |                |                | 11.34             |                  | 3.24    | -0.3248 | T887            |         |      |
| Tyr              |                |                | 2.86              |                  | 8.17    | -0.1033 | T887            |         |      |
| Val              |                |                | 3.08              |                  | 8.56    | -0.2353 | T887            |         |      |
| <i>qPC7.1</i>    |                |                | PC                |                  | 5.72    | 4.63    | 9.42            | -0.0004 | T887 |
| <i>qAAC7.2</i>   |                |                | Thr               |                  | 5.72    | 5.2     | 15.33           | -0.2440 | T887 |
| <i>qAAC7.3</i>   |                | Gly            | 13.16             | 3.27             | 4.46    | -0.1426 | T887            |         |      |
| 8                | <i>qAAC8.1</i> | Gly            | 22.70             | 2.66             | 16.3    | -0.2727 | T887            |         |      |
|                  | <i>qAAC8.2</i> | Lys            | 26.45             | 3.08             | 9.31    | -0.1754 | T887            |         |      |

<sup>a</sup>Chromosome; <sup>b</sup>Logarithm of odds for QTL peak; <sup>c</sup>Phenotypic variance explained by QTL; <sup>d</sup>Additive effect of QTL.

Supplementary Table 2. PC and AAC QTLs identified in RILs

Supplementary Table 3. List of QTLs for PC and AAC in the present and previous studies

| Chr <sup>a</sup> | Trait                                                                  | QTL             | Markers                   | Position <sup>b</sup><br>(Mbp) | Parents <sup>c</sup> | Reference<br>of QTLs <sup>d</sup> |
|------------------|------------------------------------------------------------------------|-----------------|---------------------------|--------------------------------|----------------------|-----------------------------------|
| 1                | PC                                                                     | <i>qGPC1.1</i>  | Afx93237905-Afx93229368   | 0.6-1.11                       | AN                   | C                                 |
|                  | PC                                                                     | <i>qPC1.1</i>   | RM10080-RM575             | 1.5-8.1                        | SN                   | Q                                 |
|                  | His                                                                    | <i>qAAC1.1</i>  | 2886294-3539052           | 2.9-3.5                        | MT                   | J                                 |
|                  | His                                                                    | <i>qAAC1.2</i>  | 4301442-4494576           | 4.3-4.5                        | MT                   | J                                 |
|                  | Ser                                                                    | <i>qAAC1.3</i>  | 4632918-4708475           | 4.6-4.7                        | MT                   | J                                 |
|                  | PC                                                                     | <i>qPC1.1</i>   | 4632918-4708475           | 4.6-4.7                        | MT                   | J                                 |
|                  | Ser                                                                    | <i>qAAC1.4</i>  | 5154287-5197935           | 5.15-5.19                      | MT                   | J                                 |
|                  | Asp/Thr/Ser/Glu/Gly/Ala/Val/Ile/Leu/Phe/His/Arg/Pro/Total <sup>e</sup> | <i>qAa1</i>     | RM493-RM562               | 12.3-14.6                      | ZD                   | Z                                 |
|                  | PC                                                                     | <i>qPr1</i>     | RM493-RM562               | 12.3-14.6                      | ZD                   | Z                                 |
|                  | PC                                                                     | <i>qPC1</i>     | YJInDel-34-YJInDel-536_2  | 26.2-29.4                      | YJ                   | K                                 |
|                  | Ser                                                                    | <i>qAAC1.5</i>  | 37112359-37711021         | 37.1-37.7                      | MT                   | J                                 |
|                  | Eaa <sup>f</sup> /Total/Asp/Thr/Glu/Gly/Ala/Cys/Tyr/Pro                | <i>qAA.1</i>    | RM472-RM104               | 37.9-40.2                      | ZN                   | W                                 |
|                  | His                                                                    | <i>qAAC1.6</i>  | 39162572-39234399         | 39.16-39.23                    | MT                   | J                                 |
|                  | PC                                                                     | <i>qPC1.2</i>   | 39162572-39234399         | 39.16-39.23                    | MT                   | J                                 |
| 2                | Ser                                                                    | <i>qAAC2.1</i>  | 4065908-4220624           | 4.1-4.2                        | MT                   | J                                 |
|                  | PC                                                                     | <i>qSGPC2.1</i> | Affx93260438-Affx93236905 | 5.17-6.17                      | AN                   | C                                 |
|                  | PC                                                                     | <i>qPC-2</i>    | RM5897-RM6247             | 5.8-6.7                        | CN2                  | L                                 |
|                  | Val/Ile/Leu/His/Phe                                                    | <i>qAA.2</i>    | RM322-RM521               | 7.4-10.8                       | ZN                   | W                                 |
|                  | PC                                                                     | <i>qPC2</i>     | YJInDel-61-YJInDel-67     | 8.0-13.5                       | YJ                   | K                                 |
|                  | His                                                                    | <i>qAA.2</i>    | RM324-RM301               | 11.4-12.2                      | ZN                   | W                                 |
|                  | Ser                                                                    | <i>qAAC2.2</i>  | 18092703-18131695         | 18.09-18.13                    | MT                   | J                                 |
|                  | Ala                                                                    | <i>qAAC3.1</i>  | 4542873-4614153           | 4.5-4.6                        | MT                   | J                                 |
| 3                | Gly                                                                    | <i>qAAC3.2</i>  | 5140419-5225129           | 5.1-5.2                        | MT                   | J                                 |
|                  | PC                                                                     | <i>qPC-3</i>    | RM251-RM282               | 10.0-12.4                      | XM                   | Y2                                |
|                  | PC                                                                     | <i>qPC3</i>     | YJInDel-128-YJInDel-130   | 22.8-24.7                      | YJ                   | K                                 |
|                  | Tyr                                                                    | <i>qAA.3</i>    | RM520-RM468               | 30.9-32.7                      | ZN                   | W                                 |
|                  | Ala/Val/Leu/Ile/Phe                                                    | <i>qAla3</i>    | id3015453-id3016090       | 32.5-33.7                      | DT                   | Y3                                |
|                  | Thr/Gly/His/Arg                                                        | <i>qAA.4</i>    | RM348-RM131               | 32.7-34.4                      | ZN                   | W                                 |
|                  | PC                                                                     | <i>qPC-6</i>    | RM190-RZ516               | 1.8-2.6                        | XM                   | Y2                                |
| 6                | Ala/Arg/Asx/Glx/Gly/Ile/Leu/Met/Phe/Tyr/Val                            | <i>qAAC6.1</i>  | 3515361-3658340           | 3.51-3.65                      | MT                   | J                                 |
|                  | Met                                                                    | <i>qAAC6.2</i>  | 4192641-4230522           | 4.19-4.23                      | MT                   | J                                 |
|                  | PC                                                                     | <i>qPC6</i>     | YJInDel-207-YJInDel-208   | 5.2-7.9                        | YJ                   | K                                 |
|                  | Arg/Ile/Leu/Phe/Ala/Asx/Glx/Ser/Tyr/Val                                | <i>qAAC7.1</i>  | 4856196-5206110           | 4.9-5.2                        | MT                   | J                                 |
|                  | Pro/Gly/Met/Arg                                                        | <i>qAA.7</i>    | RM125-RM214               | 5.5-12.8                       | ZN                   | W                                 |
|                  | Thr                                                                    | <i>qAAC7.2</i>  | 5627191-5803738           | 5.6-5.8                        | MT                   | J                                 |
|                  | PC                                                                     | <i>qPC7.1</i>   | 5627191-5803738           | 5.6-5.8                        | MT                   | J                                 |
|                  | Gly                                                                    | <i>qAAC7.3</i>  | 11635687-14689865         | 11.6-14.7                      | MT                   | J                                 |
|                  | PC                                                                     | <i>qPr7</i>     | RM445-RM418               | 17.5-18.1                      | ZD                   | Z                                 |
|                  | PC                                                                     | <i>qSGPC7.1</i> | Affx93225742-Affx93256949 | 22.2-22.3                      | AN                   | C                                 |
| 8                | PC                                                                     | <i>qPC.1</i>    | R1245-RM234               | 24.3-25.5                      | ZM                   | T                                 |
|                  | PC                                                                     | qPro-8          | RM506-RM1235              | 0.13-1.21                      | CN1                  | Y1                                |
|                  | PC                                                                     | <i>qPC8</i>     | YJInDel-306-YJInDel-320   | 3.0-4.1                        | YJ                   | K                                 |
|                  | PC                                                                     | <i>qPC8</i>     | YJInDel-321-YJInDel-324   | 5.1-5.7                        | YJ                   | K                                 |
|                  | PC                                                                     | <i>qPC8</i>     | YJInDel-324-YJInDel-340   | 5.7-8.6                        | YJ                   | K                                 |
|                  | Tyr                                                                    | <i>qAA.8</i>    | RM137-RM556               | 13.9-22.3                      | ZN                   | W                                 |
|                  | Gly                                                                    | <i>qAAC8.1</i>  | 19156876-26250116         | 19.2-26.3                      | MT                   | J                                 |
|                  | Lys                                                                    | <i>qAAC8.2</i>  | 26398897-26510920         | 26.4-26.5                      | MT                   | J                                 |
|                  | Cys                                                                    | <i>qAA.8</i>    | RM447-RM458               | 26.5-27.4                      | ZN                   | W                                 |
|                  | PC                                                                     | qPro-9          | RM219-RM23914             | 7.2-7.9                        | CN1                  | Y1                                |
|                  | Asp/Thr/Ser/Gly/Val/Ile/Phe/Lys/Total                                  | <i>qAa9</i>     | RM328-RM107               | 19.7-20.1                      | ZD                   | Z                                 |

|    |                 |                |                         |           |    |    |
|----|-----------------|----------------|-------------------------|-----------|----|----|
| 10 | Cys/Leu/Ile/Phe | <i>qAA.10</i>  | RM467-RM271             | 13.5-16.7 | ZN | W  |
|    | PC              | <i>qPC-10</i>  | RM184-RM3229B           | 16.4-16.7 | XM | Y2 |
| 11 | PC              | <i>qPC11.1</i> | 11027-RM287             | 16.5-17.2 | SN | Q  |
|    | PC              | <i>qPC11.1</i> | RM287-RM26755           | 17.2-17.6 | SN | Q  |
| 12 | PC              | <i>qPC12</i>   | YJInDel-510–YJInDel-515 | 23.6-25.4 | YJ | K  |

<sup>a</sup>Chr. chromosome

<sup>b</sup>Physical positions of the markers were determined using IRGSP 1.0 Nipponbare reference genome (Sakai et al., 2013)

<sup>c</sup>Parents of mapping population. MT, Milyang23/Tong88-7; AN, ARC10075/Naveen; CN1, Cheongcheong/Nagdong; CN2, Chuan7/Nanyanghan; DT, Dasanbyeo/TR22183; SN, Samgang/Nagdong; XM, Xieqingzao B/Milyang46; YJ, Yukihikari/Joiku462; ZD, Zhenshan97B/Delong208; ZM, Zhenshan97/Minghui63; ZN, Zhenshan97/Nanyangzhan

<sup>d</sup>Reference of QTLs. J, this study; C, Chattopadhyay et al., 2019; K, Kinoshita et al., 2017; L, Lou et al., 2009; Q, Qin et al., 2009; T, Tan et al., 2001; W, Wang et al., 2007; Y1, Yun et al., 2014; Y2, Yu et al., 2009; Y3, Yoo, 2017; Z, Zhong et al., 2011.

<sup>e</sup>total, content of all amino acid; <sup>f</sup>EAA, the total amount of essential amino acid.

### Supplementary Table 3. List of QTLs for PC and AAC in the present and previous studies
